# Supplementary material for: Study protocol: ACCESS: (Advancing Contraceptive Equity and Service Uptake through Telemedicine in the US Safety-Net)
Source: Research Square preprint supplement (doi:10.21203/rs.3.rs-6256504/v1), 2025-08-25
Supplement: Supplementary file 1 [file f0b42cc379aa97e286ce6878.docx]

**Appendix**

**Codes for Contraceptive Care Services or Procedures**

| **Code** | **Code Type** | **Code Description** | **Incident** | **Surveillance** | **Counseling** | **Removal** |
| --- | --- | --- | --- | --- | --- | --- |
| T83.31XA | ICD10CM | Breakdown (mechanical) of intrauterine contraceptive device, initial encounter | 0 | 1 | 0 | 0 |
| T83.31XD | ICD10CM | Breakdown (mechanical) of intrauterine contraceptive device, subsequent encounter | 0 | 1 | 0 | 0 |
| T83.31XS | ICD10CM | Breakdown (mechanical) of intrauterine contraceptive device, sequela | 0 | 1 | 0 | 0 |
| T83.32XA | ICD10CM | Displacement of intrauterine contraceptive device, initial encounter | 0 | 1 | 0 | 0 |
| T83.32XD | ICD10CM | Displacement of intrauterine contraceptive device, subsequent encounter | 0 | 1 | 0 | 0 |
| T83.32XS | ICD10CM | Displacement of intrauterine contraceptive device, sequela | 0 | 1 | 0 | 0 |
| T83.39XA | ICD10CM | Other mechanical complication of intrauterine contraceptive device, initial encounter | 0 | 1 | 0 | 0 |
| T83.39XD | ICD10CM | Other mechanical complication of intrauterine contraceptive device, subsequent encounter | 0 | 1 | 0 | 0 |
| T83.39XS | ICD10CM | Other mechanical complication of intrauterine contraceptive device, sequela | 0 | 1 | 0 | 0 |
| Z30.02 | ICD10CM | Counseling and instruction in natural family planning to avoid pregnancy | 0 | 0 | 1 | 0 |
| Z30.09 | ICD10CM | Encounter for other general counseling and advice on contraception | 0 | 0 | 1 | 0 |
| Z30.40 | ICD10CM | Encounter for surveillance of contraceptives, unspecified | 0 | 1 | 0 | 0 |
| Z30.41 | ICD10CM | Encounter for surveillance of contraceptive pills | 0 | 1 | 0 | 0 |
| Z30.42 | ICD10CM | Encounter for surveillance of injectable contraceptive | 0 | 1 | 0 | 0 |
| Z30.43 | ICD10CM | Encounter for surveillance of intrauterine contraceptive device | 0 | 1 | 0 | 0 |
| Z30.431 | ICD10CM | Encounter for routine checking of intrauterine contraceptive device | 0 | 1 | 0 | 0 |
| Z30.44 | ICD10CM | Encounter for surveillance of vaginal ring hormonal contraceptive device | 0 | 1 | 0 | 0 |
| Z30.45 | ICD10CM | Encounter for surveillance of transdermal patch hormonal contraceptive device | 0 | 1 | 0 | 0 |
| Z30.46 | ICD10CM | Encounter for surveillance of implantable subdermal contraceptive | 0 | 1 | 0 | 0 |
| Z30.49 | ICD10AM | Encounter for surveillance of other contraceptives | 0 | 1 | 0 | 0 |
| 11982 | CPT | REMOVAL NON-BIODEGRADABLE DRUG DELIVERY IMPLANT | 0 | 0 | 0 | 1 |
| 11983 | CPT | Removal with reinsertion, non- biodegradable drug delivery implant, Implanon or Nexplanon | 1 | 0 | 0 | 1 |
| 58301 | CPT | Removal of IUD | 0 | 0 | 0 | 1 |
| Z30.432 | ICD10CM | Encounter for removal of intrauterine contraceptive device | 0 | 0 | 0 | 1 |
| Z30.433 | ICD10CM | Encounter for removal and reinsertion of intrauterine contraceptive device | 1 | 0 | 0 | 1 |
| 11981 | CPT | Insertion, non- biodegradable drug delivery implant, Implanon or Nexplanon | 1 | 0 | 0 | 0 |
| 58300 | CPT | Insertion of IUD | 1 | 0 | 0 | 0 |
| 58565 | CPT | Hysteroscopy, surgical; with sampling (biopsy) of endometrium and/or polypectomy, with or without D &C; with bilateral fallopian tube cannulation to induce occlusion by placement of permanent implants | 1 | 0 | 0 | 0 |
| 58600 | CPT | Ligation or transection of fallopian tube(s), abdominal or vaginal approach, unilateral or bilateral | 1 | 0 | 0 | 0 |
| 58605 | CPT | Ligation or transection of fallopian tube(s), abdominal or vaginal approach, postpartum, unilateral or bilateral, during same hospitalization (separate procedure) | 1 | 0 | 0 | 0 |
| 58611 | CPT | Ligation or transection of fallopian tube(s) when done at the time of cesarean delivery or intra-abdominal surgery (not a separate procedure) | 1 | 0 | 0 | 0 |
| 58615 | CPT | Occlusion of fallopian tube(s) by device (e.g., band, clip, Falope ring) vaginal or suprapubic approach | 1 | 0 | 0 | 0 |
| 58670 | CPT | Laparoscopy, surgical; with lysis of adhesions, with fulguration of oviducts (with or without transection) | 1 | 0 | 0 | 0 |
| 58671 | CPT | Laparoscopy, surgical; with lysis of adhesions, with occlusion of oviducts by device (e.g., band, clip or Falope ring) | 1 | 0 | 0 | 0 |
| 0567T | CPT | Blockage of fallopian tubes with implants inserted through cervix | 1 | 0 | 0 | 0 |
| 0JHD0HZ | ICD10PCS | Insertion of Contraceptive Device into Right Upper Arm Subcutaneous Tissue and Fascia, Open Approach | 1 | 0 | 0 | 0 |
| 0JHD3HZ | ICD10PCS | Insertion of Contraceptive Device into Right Upper Arm Subcutaneous Tissue and Fascia, Percutaneous Approach | 1 | 0 | 0 | 0 |
| 0JHF0HZ | ICD10PCS | Insertion of Contraceptive Device into Left Upper Arm Subcutaneous Tissue and Fascia, Open Approach | 1 | 0 | 0 | 0 |
| 0JHF3HZ | ICD10PCS | Insertion of Contraceptive Device into Left Upper Arm Subcutaneous Tissue and Fascia, Percutaneous Approach | 1 | 0 | 0 | 0 |
| 0JHG0HZ | ICD10PCS | Insertion of Contraceptive Device into Right Lower Arm Subcutaneous Tissue and Fascia, Open Approach | 1 | 0 | 0 | 0 |
| 0JHG3HZ | ICD10PCS | Insertion of Contraceptive Device into Right Lower Arm Subcutaneous Tissue and Fascia, Percutaneous Approach | 1 | 0 | 0 | 0 |
| 0JHH0HZ | ICD10PCS | Insertion of Contraceptive Device into Left Lower Arm Subcutaneous Tissue and Fascia, Open Approach | 1 | 0 | 0 | 0 |
| 0JHH3HZ | ICD10PCS | Insertion of Contraceptive Device into Left Lower Arm Subcutaneous Tissue and Fascia, Percutaneous Approach | 1 | 0 | 0 | 0 |
| 0U570ZZ | ICD10PCS | Destruction of Bilateral Fallopian Tubes, Open Approach | 1 | 0 | 0 | 0 |
| 0U573ZZ | ICD10PCS | Destruction of Bilateral Fallopian Tubes, Percutaneous Approach | 1 | 0 | 0 | 0 |
| 0U574ZZ | ICD10PCS | Destruction of Bilateral Fallopian Tubes, Percutaneous Endoscopic Approach | 1 | 0 | 0 | 0 |
| 0U577ZZ | ICD10PCS | Destruction of Bilateral Fallopian Tubes, Via Natural or Artificial Opening | 1 | 0 | 0 | 0 |
| 0U578ZZ | ICD10PCS | Destruction of Bilateral Fallopian Tubes, Via Natural or Artificial Opening Endoscopic | 1 | 0 | 0 | 0 |
| 0UH90HZ | ICD10PCS | Insertion of Contraceptive Device into Uterus, Open Approach | 1 | 0 | 0 | 0 |
| 0UH97HZ | ICD10PCS | Insertion of Contraceptive Device into Uterus, Via Natural or Artificial Opening | 1 | 0 | 0 | 0 |
| 0UH98HZ | ICD10PCS | Insertion of Contraceptive Device into Uterus, Via Natural or Artificial Opening Endoscopic | 1 | 0 | 0 | 0 |
| 0UHC7HZ | ICD10PCS | Insertion of Contraceptive Device into Cervix, Via Natural or Artificial Opening | 1 | 0 | 0 | 0 |
| 0UHC8HZ | ICD10PCS | Insertion of Contraceptive Device into Cervix, Via Natural or Artificial Opening Endoscopic | 1 | 0 | 0 | 0 |
| 0UL70CZ | ICD10PCS | Occlusion of Bilateral Fallopian Tubes with Extraluminal Device, Open Approach | 1 | 0 | 0 | 0 |
| 0UL70DZ | ICD10PCS | Occlusion of Bilateral Fallopian Tubes with Intraluminal Device, Open Approach | 1 | 0 | 0 | 0 |
| 0UL70ZZ | ICD10PCS | Occlusion of Bilateral Fallopian Tubes, Open Approach | 1 | 0 | 0 | 0 |
| 0UL73CZ | ICD10PCS | Occlusion of Bilateral Fallopian Tubes with Extraluminal Device, Percutaneous Approach | 1 | 0 | 0 | 0 |
| 0UL73DZ | ICD10PCS | Occlusion of Bilateral Fallopian Tubes with Intraluminal Device, Percutaneous Approach | 1 | 0 | 0 | 0 |
| 0UL73ZZ | ICD10PCS | Occlusion of Bilateral Fallopian Tubes, Percutaneous Approach | 1 | 0 | 0 | 0 |
| 0UL74CZ | ICD10PCS | Occlusion of Bilateral Fallopian Tubes with Extraluminal Device, Percutaneous Endoscopic Approach | 1 | 0 | 0 | 0 |
| 0UL74DZ | ICD10PCS | Occlusion of Bilateral Fallopian Tubes with Intraluminal Device, Percutaneous Endoscopic Approach | 1 | 0 | 0 | 0 |
| 0UL74ZZ | ICD10PCS | Occlusion of Bilateral Fallopian Tubes, Percutaneous Endoscopic Approach | 1 | 0 | 0 | 0 |
| 0UL77DZ | ICD10PCS | Occlusion of Bilateral Fallopian Tubes with Intraluminal Device, Via Natural or Artificial Opening | 1 | 0 | 0 | 0 |
| 0UL77ZZ | ICD10PCS | Occlusion of Bilateral Fallopian Tubes, Via Natural or Artificial Opening | 1 | 0 | 0 | 0 |
| 0UL78DZ | ICD10PCS | Occlusion of Bilateral Fallopian Tubes with Intraluminal Device, Via Natural or Artificial Opening Endoscopic | 1 | 0 | 0 | 0 |
| 0UL78ZZ | ICD10PCS | Occlusion of Bilateral Fallopian Tubes, Via Natural or Artificial Opening Endoscopic | 1 | 0 | 0 | 0 |
| 0UT70ZZ | ICD10PCS | Resection of Bilateral Fallopian Tubes, Open Approach | 1 | 0 | 0 | 0 |
| 0UT74ZZ | ICD10PCS | Resection of Bilateral Fallopian Tubes, Percutaneous Endoscopic Approach | 1 | 0 | 0 | 0 |
| 0UT77ZZ | ICD10PCS | Resection of Bilateral Fallopian Tubes, Via Natural or Artificial Opening | 1 | 0 | 0 | 0 |
| 0UT78ZZ | ICD10PCS | Resection of Bilateral Fallopian Tubes, Via Natural or Artificial Opening Endoscopic | 1 | 0 | 0 | 0 |
| 0UT7FZZ | ICD10PCS | Resection of Bilateral Fallopian Tubes, Via Natural or Artificial Opening With Percutaneous Endoscopic Assistance | 1 | 0 | 0 | 0 |
| A4264 | HCPCS | Permanent implantable contraceptive intratubal occlusion device and delivery system | 1 | 0 | 0 | 0 |
| J1050 | HCPCS | Injection, medroxyprogesterone acetate | 1 | 0 | 0 | 0 |
| J7294 | HCPCS | Segesterone acetate and ethinyl estradiol 0.15mg, 0.013mg per 24 hours; yearly vaginal system, each | 1 | 0 | 0 | 0 |
| J7295 | HCPCS | Ethinyl estradiol and etonogestrel 0.015mg, 0.12mg per 24 hours; monthly vaginal ring, each | 1 | 0 | 0 | 0 |
| J7296 | HCPCS | Levonorgestrel-releasing intrauterine contraceptive system (Kyleena), 19.5 mg | 1 | 0 | 0 | 0 |
| J7297 | HCPCS | Levonorgestrel-releasing intrauterine contraceptive system, 52 mg, 3 years duration | 1 | 0 | 0 | 0 |
| J7298 | HCPCS | Levonorgestrel-releasing intrauterine contraceptive system, 52 mg, 5 year duration | 1 | 0 | 0 | 0 |
| J7300 | HCPCS | Intrauterine copper contraceptive | 1 | 0 | 0 | 0 |
| J7301 | HCPCS | Levonorgestrel-releasing intrauterine contraceptive system, 13.5 mg | 1 | 0 | 0 | 0 |
| J7304 | HCPCS | Contraceptive supply, hormone containing patch, each | 1 | 0 | 0 | 0 |
| J7306 | HCPCS | Levonorgestrel (contraceptive) implant system, including implants and supplies | 1 | 0 | 0 | 0 |
| J7307 | HCPCS | Etonogestrel [contraceptive] implant system, including implant and supplies | 1 | 0 | 0 | 0 |
| S4981 | HCPCS | Insertion of levonorgestrel- releasing intrauterine system | 1 | 0 | 0 | 0 |
| S4989 | HCPCS | Contraceptive intrauterine device (e.g. progestacertiud), including implants and supplies | 1 | 0 | 0 | 0 |
| Z30.011 | ICD10CM | Encounter for initial prescription of contraceptive pills | 1 | 0 | 0 | 0 |
| Z30.013 | ICD10CM | Encounter for initial prescription of injectable contraceptive | 1 | 0 | 0 | 0 |
| Z30.014 | ICD10CM | Encounter for initial prescription of intrauterine contraceptive device | 1 | 0 | 0 | 0 |
| Z30.015 | ICD10CM | Encounter for initial prescription of vaginal ring hormonal contraceptive | 1 | 0 | 0 | 0 |
| Z30.016 | ICD10CM | Encounter for initial prescription of transdermal patch hormonal contraceptive device | 1 | 0 | 0 | 0 |
| Z30.017 | ICD10CM | Encounter for initial prescription of implantable subdermal contraceptive | 1 | 0 | 0 | 0 |
| Z30.019 | ICD10CM | Encounter for initial prescription of contraceptives, unsp | 1 | 0 | 0 | 0 |
| Z30.2 | ICD10CM | Encounter for sterilization | 1 | 0 | 0 | 0 |
| Z30.430 | ICD10CM | Encounter for insertion of intrauterine contraceptive device | 1 | 0 | 0 | 0 |
| Z30.01 | ICD10CM | Encounter for initial presciption of contraceptives | 1 | 0 | 0 | 0 |
| Z30.012 | ICD10CM | Encounter for intial prescription of emergency contraception | 1 | 0 | 0 | 0 |
